# Supplementary material
Source: Springer Nature journal article supplement (https://www.springermedizin.de/resource/supplementary/12888_2011_877_MOESM2_ESM.pdf/9478356)

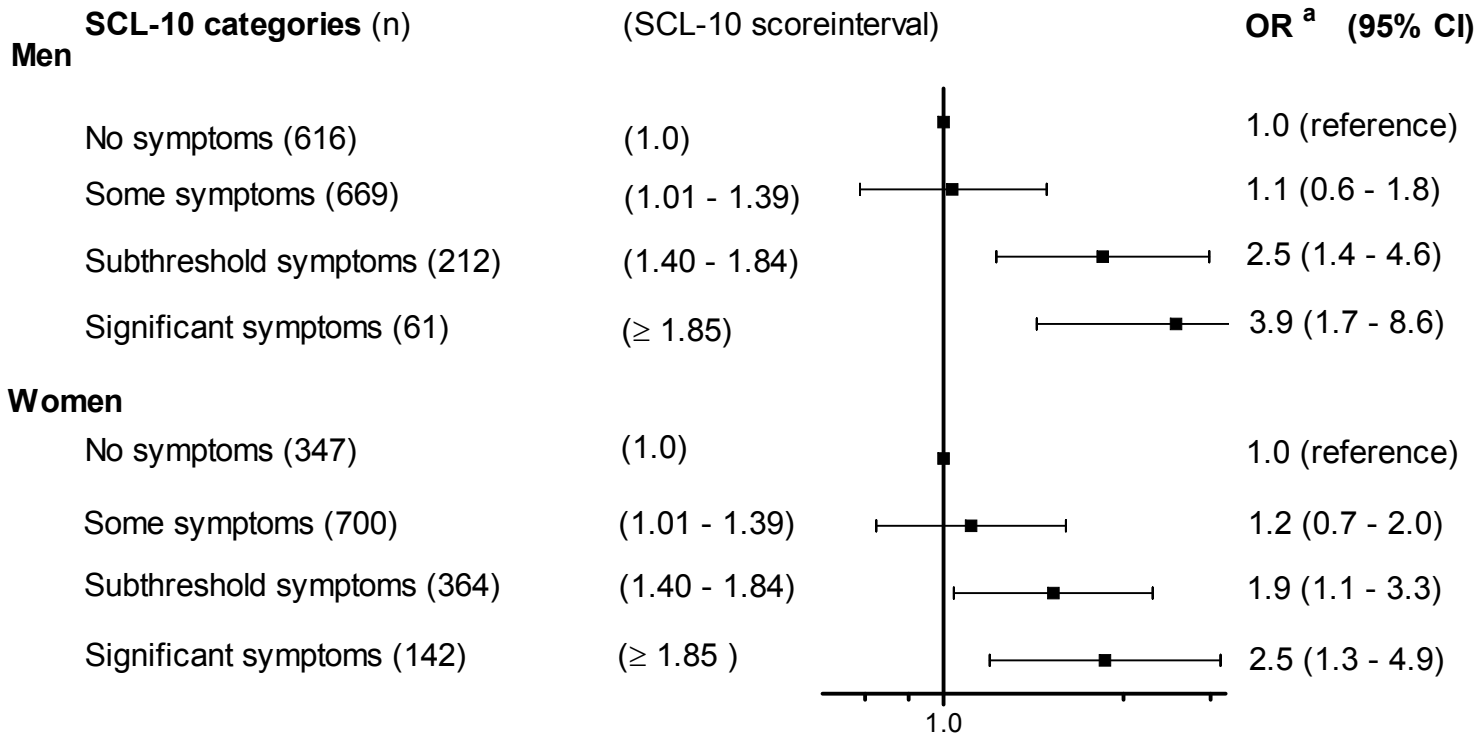

Supplement: MOESM2 [file 9478356]
